# Supplementary material for: Simultaneous determination of selected veterinary antibiotics in Nile tilapia (Orechromis niloticus) and water samples by HPLC/UV and LC-MS/MS
Source: Royal Society of Chemistry journal article supplement (doi:10.1039/c7ra08398j), 2017-01-01
Supplement: c7ra08398j1.pdf [file c7ra08398j1.pdf]

Table S1: Recovery% for TMP,SDI, STZ, CTC, DOX, FF, NAL and FLU from spiked fish muscle by HPLC-UV method after using different extraction solvents .

| Solvent                                           | Compound recovery <sup>a</sup> % |       |       |       |       |       |       |       |
|---------------------------------------------------|----------------------------------|-------|-------|-------|-------|-------|-------|-------|
|                                                   | TMP                              | SDI   | STZ   | CTC   | DOX   | FF    | NAL   | FLU   |
| <b>Methanol</b>                                   | 47.40                            | 45.70 | 50.60 | 14.90 | 18.20 | 56.90 | 8.20  | 6.50  |
| <b>0.2%formic acid in methanol</b>                | 63.00                            | 87.00 | 92.40 | 43.80 | 40.90 | 95.80 | 14.30 | 9.80  |
| <b>0.2% formic acid in acetonitrile</b>           | 55.80                            | 85.20 | 91.00 | 57.00 | 44.00 | 83.00 | 92.90 | 95.20 |
| <b>0.2% formic acid in acetonitrile +Methanol</b> | 88.90                            | 99.00 | 99.80 | 99.70 | 95.90 | 99.90 | 94.20 | 93.40 |

<sup>a</sup>: Mean of three determinations.

Table S2: The system suitability test results of the developed HPLC-UV method for determination of TMP, SDI, STZ, CTC, DOX, FF, NAL and FLU .

| <b>Compound</b> | <b>Retention<br/>time<br/>(min)</b> | <b>Capacity<br/>factor<br/>(K')</b> | <b>Selectivity<br/>(<math>\alpha</math>)<sup>a</sup></b> | <b>Resolution<br/>(R<sub>s</sub>)<sup>b</sup></b> | <b>Tailing<br/>factor</b> |
|-----------------|-------------------------------------|-------------------------------------|----------------------------------------------------------|---------------------------------------------------|---------------------------|
| <b>TMP</b>      | 4.58                                | 4.39                                | 1.23 <sub>(a1)</sub>                                     | 3.82 <sub>(b1)</sub>                              | 0.96                      |
| <b>SDI</b>      | 5.44                                | 5.41                                | 1.16 <sub>(a2)</sub>                                     | 2.87 <sub>(b2)</sub>                              | 0.81                      |
| <b>STZ</b>      | 6.22                                | 6.32                                | 1.75 <sub>(a3)</sub>                                     | 17.56 <sub>(b3)</sub>                             | 0.79                      |
| <b>CTC</b>      | 10.27                               | 11.09                               | 1.09 <sub>(a4)</sub>                                     | 5.49 <sub>(b4)</sub>                              | 1.10                      |
| <b>DOX</b>      | 11.19                               | 12.16                               | 1.16 <sub>(a5)</sub>                                     | 9.90 <sub>(b5)</sub>                              | 0.99                      |
| <b>FF</b>       | 12.70                               | 14.18                               | 1.27 <sub>(a6)</sub>                                     | 16.50 <sub>(b6)</sub>                             | 0.83                      |
| <b>NAL</b>      | 16.19                               | 18.05                               | 1.05 <sub>(a7)</sub>                                     | 3.09 <sub>(b7)</sub>                              | 0.78                      |
| <b>FLU</b>      | 17.03                               | 19.04                               |                                                          |                                                   | 0.95                      |

The retention time of unretained peak is 0.85 min.

a<sub>1</sub>, b<sub>1</sub>: are  $\alpha$  and R<sub>s</sub> calculated for SDI-TMP.

a<sub>2</sub>, b<sub>2</sub>: are  $\alpha$  and R<sub>s</sub> calculated for STZ-SDI.

a<sub>3</sub>, b<sub>3</sub>: are  $\alpha$  and R<sub>s</sub> calculated for CTC-STZ.

a<sub>4</sub>, b<sub>4</sub>: are  $\alpha$  and R<sub>s</sub> calculated for DOX-CTC.

a<sub>5</sub>, b<sub>5</sub>: are  $\alpha$  and R<sub>s</sub> calculated for FF-DOX.

a<sub>6</sub>, b<sub>6</sub>: are  $\alpha$  and R<sub>s</sub> calculated for NAL-FF.

a<sub>7</sub>, b<sub>7</sub>: are  $\alpha$  and R<sub>s</sub> calculated for FLU-NAL.

Table S3: Characteristic parameters of the calibration equations for the proposed HPLC-UV method for simultaneous determination of TMP, SDI, STZ, CTC, DOX, FF, NAL, and FLU in water.

| Parameters                                                    | TMP                                     | SDI                                     | STZ                                     | CTC                                     | DOX                                     | FF                                      | NAL                                     | FLU                                     |
|---------------------------------------------------------------|-----------------------------------------|-----------------------------------------|-----------------------------------------|-----------------------------------------|-----------------------------------------|-----------------------------------------|-----------------------------------------|-----------------------------------------|
| <b>Calibration range ( <math>\mu\text{g ml}^{-1}</math>)</b>  | 2-30                                    | 2-25                                    | 2-25                                    | 2-30                                    | 2-30                                    | 5-40                                    | 2-20                                    | 2-25                                    |
| <b>Detection limit ( <math>\mu\text{g ml}^{-1}</math>)</b>    | 0.016                                   | 0.024                                   | 0.019                                   | 0.014                                   | 0.02                                    | 0.025                                   | 0.005                                   | 0.01                                    |
| <b>Quantitation limit ( <math>\mu\text{g ml}^{-1}</math>)</b> | 0.056                                   | 0.08                                    | 0.063                                   | 0.049                                   | 0.067                                   | 0.08                                    | 0.017                                   | 0.03                                    |
| <b>Regression equation (Y)<sup>a</sup>:<br/>Slope (b)</b>     | $37.41 \times 10^3$                     | $13.18 \times 10^4$                     | $11.20 \times 10^4$                     | $47.81 \times 10^3$                     | $41.80 \times 10^3$                     | $61.56 \times 10^2$                     | $23.33 \times 10^4$                     | $11.82 \times 10^4$                     |
| <b>Standard deviation of the slope (S<sub>b</sub>)</b>        | 274.69                                  | 1385.8                                  | 932.56                                  | 307.85                                  | 371.49                                  | 67.17                                   | 543.3                                   | 492.57                                  |
| <b>Relative standard deviation of the slope (%)</b>           | 0.73                                    | 1.05                                    | 0.83                                    | 0.64                                    | 0.88                                    | 1.09                                    | 0.23                                    | 0.41                                    |
| <b>Confidence limit of the slope <sup>b</sup></b>             | $37.17 \times 10^3 - 37.64 \times 10^3$ | $13.06 \times 10^3 - 13.30 \times 10^3$ | $11.11 \times 10^4 - 11.28 \times 10^4$ | $47.54 \times 10^3 - 48.08 \times 10^3$ | $41.48 \times 10^3 - 42.12 \times 10^3$ | $60.98 \times 10^2 - 62.14 \times 10^2$ | $23.28 \times 10^4 - 23.38 \times 10^4$ | $11.77 \times 10^4 - 11.86 \times 10^4$ |
| <b>Intercept (a)</b>                                          | 109.2                                   | 1084.9                                  | 613.78                                  | 60.408                                  | -120.39                                 | -54.85                                  | 283.26                                  | 303.59                                  |
| <b>Standard deviation of the intercept (S<sub>a</sub>)</b>    | 481.89                                  | 1946.38                                 | 1309.74                                 | 540.05                                  | 651.71                                  | 169.61                                  | 604.1                                   | 691.79                                  |
| <b>Confidence limit of the intercept <sup>b</sup></b>         | $(-307.68) - 526.1$                     | $(-598.91) - 2768.76$                   | $(-519.29) - 1746.86$                   | $(-406.8) - 527.6$                      | $(-684.2) - 443.4$                      | $(-201.59) - 91.87$                     | $(-239.36) - 805.88$                    | $(-294.88) - 902.07$                    |
| <b>Correlation coefficient (r)</b>                            | 0.9999                                  | 0.9999                                  | 0.9999                                  | 0.9998                                  | 0.9999                                  | 0.9999                                  | 0.9999                                  | 0.9999                                  |

<sup>a</sup> $Y = a + bC$ , where C is the concentration of compound in  $\mu\text{g ml}^{-1}$  and Y is the peak area.

<sup>b</sup>95 % confidence limit.

Table S4: Characteristic parameters of the calibration equations for the proposed HPLC-UV method for simultaneous determination of TMP, SDI, STZ , CTC , DOX, FF, NAL, and FLU in fish muscle.

| Parameters                                               | TMP                | SDI                 | STZ                  | CTC                | DOX                | FF                 | NAL                  | FLU                  |
|----------------------------------------------------------|--------------------|---------------------|----------------------|--------------------|--------------------|--------------------|----------------------|----------------------|
| Calibration range ( $\mu\text{g kg}^{-1}$ )              | 30-300             | 30-300              | 30-300               | 30-300             | 30-300             | 30-300             | 30-300               | 30-300               |
| Detection limit ( $\mu\text{g kg}^{-1}$ )                | 0.03               | 0.02                | 0.04                 | 0.03               | 0.03               | 0.03               | 0.02                 | 0.04                 |
| Quantitation limit ( $\mu\text{g kg}^{-1}$ )             | 0.10               | 0.08                | 0.13                 | 0.11               | 0.12               | 0.12               | 0.08                 | 0.13                 |
| Regression equation (Y) <sup>a</sup> :<br>Slope (b)      | 23.37              | 19.52               | 19.37                | 19.23              | 26.38              | 23.49              | 22.20                | 19.45                |
| Standard deviation of the slope<br>(S <sub>b</sub> )     | 0.33               | 0.22                | 0.36                 | 0.23               | 0.45               | 0.39               | 0.26                 | 0.36                 |
| Relative standard deviation of the<br>slope (%)          | 1.43               | 1.17                | 1.87                 | 1.50               | 1.73               | 1.66               | 1.21                 | 1.87                 |
| Confidence limit of the slope <sup>b</sup>               | 23.04–23.69        | 19.30 –19.74        | 19.02 –19.72         | 18.95 –19.51       | 25.94 –26.83       | 23.11–23.87        | 21.94 –22.46         | 19.09 –19.80         |
| Intercept (a)                                            | 504.59             | 989.72              | 1142.90              | 788.11             | 384.89             | 273.42             | 2098.95              | 2091.34              |
| Standard deviation of the intercept<br>(S <sub>a</sub> ) | 60.40              | 41.30               | 65.54                | 52.16              | 82.87              | 70.74              | 48.76                | 65.86                |
| Confidence limit of the intercept <sup>b</sup>           | 445.91 –<br>563.28 | 949.60 –<br>1029.85 | 1079.22 –<br>1206.58 | 737.42 –<br>838.79 | 304.37 –<br>465.41 | 204.68 –<br>342.16 | 2051.57 –<br>2146.33 | 2027.35 –<br>2155.33 |
| Correlation coefficient (r)                              | 0.9998             | 0.9998              | 0.9997               | 0.9998             | 0.9997             | 0.9997             | 0.9998               | 0.9997               |

<sup>a</sup> $Y = a + bC$ , where C is the concentration of compound in  $\mu\text{g kg}^{-1}$  and Y is the peak area.

<sup>b</sup>95 % confidence limit.

Table S5: Characteristic parameters of the calibration equations for LC-MS method for simultaneous determination of SDI, CTC and FF in water sample.

| <b>Parameters</b>                                          | <b>SDI</b>   | <b>CTC</b>   | <b>FF</b> |
|------------------------------------------------------------|--------------|--------------|-----------|
| <b>Calibration range ( ng ml<sup>-1</sup>)</b>             | 0.001-100    | 0.001-60     | 0. 001-20 |
| <b>Detection limit (ng ml<sup>-1</sup>)</b>                | 0.02         | 0.03         | 0.04      |
| <b>Quantitation limit (ng ml<sup>-1</sup>)</b>             | 0.07         | 0.12         | 0.14      |
| <b>Regression equation (Y)<sup>a</sup>:</b>                | 21.64        | 16.01        | 5.27      |
| <b>Slope (b)</b>                                           |              |              |           |
| <b>Standard deviation of the slope (S<sub>b</sub>)</b>     | 0.23         | 0.27         | 0.10      |
| <b>Relative standard deviation of the slope (%)</b>        | 1.08         | 1.69         | 2.02      |
| <b>Confidence limit of the slope <sup>b</sup></b>          | 21.41 –21.87 | 15.75 -16.28 | 5.16–5.37 |
| <b>Intercept (a)</b>                                       | -14.89       | 6.58         | 1.75      |
| <b>Standard deviation of the intercept (S<sub>a</sub>)</b> | 36.09        | 9.77         | 0.11      |
| <b>Confidence limit of the intercept <sup>b</sup></b>      | -49.95–20.17 | -2.92-16.08  | 1.64–1.85 |
| <b>Correlation coefficient (r)</b>                         | 0.9999       | 0.9998       | 0.9997    |
| <b>Standard error of estimation</b>                        | 23.36        | 5.42         | 0.0776    |

<sup>a</sup> $Y = a + bC$ , where C is the concentration of compound in ng ml<sup>-1</sup> and Y is the peak area.

<sup>b</sup>95 % confidence limit.

Table S6: Characteristic parameters of the calibration equations for LC-MS method for simultaneous determination of SDI, CTC and FF in fish muscle.

| <b>Parameters</b>                                              | <b>SDI</b>     | <b>CTC</b>       | <b>FF</b>       |
|----------------------------------------------------------------|----------------|------------------|-----------------|
| <b>Calibration range ( <math>\mu\text{g kg}^{-1}</math>)</b>   | 10-150         | 10-150           | 10-150          |
| <b>Detection limit ( <math>\mu\text{g kg}^{-1}</math>)</b>     | 0.03           | 0.04             | 0.04            |
| <b>Quantitation limit ( <math>\mu\text{g kg}^{-1}</math>)</b>  | 0.12           | 0.14             | 0.13            |
| <b>Regression equation (Y)<sup>a</sup>:<br/>Slope (b)</b>      | 42.89          | 315.30           | 178.76          |
| <b>Standard deviation of the slope<br/>(S<sub>b</sub>)</b>     | 0.74           | 6.07             | 3.39            |
| <b>Relative standard deviation of<br/>the slope (%)</b>        | 1.74           | 1.92             | 1.89            |
| <b>Confidence limit of the slope <sup>b</sup></b>              | 42.17 – 43.62  | 309.96 – 321.20  | 172.46 – 182.05 |
| <b>Intercept (a)</b>                                           | -16.53         | 9.59             | 11.94           |
| <b>Standard deviation of the<br/>intercept (S<sub>a</sub>)</b> | 58.55          | 475.02           | 14.89           |
| <b>Confidence limit of the<br/>intercept <sup>b</sup></b>      | -73.42 – 40.35 | -451.96 – 471.09 | -2.52 – 26.41   |
| <b>Correlation coefficient (r)</b>                             | 0.9997         | 0.9997           | 0.9997          |

<sup>a</sup> $Y = a + bC$ , where C is the concentration of compound in  $\mu\text{g kg}^{-1}$  and Y is the peak area.

<sup>b</sup>95 % confidence limit.

Table S7: a) Factors for robustness study and b) responses measured.

a) Factors for robustness study.

| Independent factors       | Levels    |          |           |
|---------------------------|-----------|----------|-----------|
|                           | Level(-1) | Level(0) | Level(+1) |
| A- ACN% start             | 8         | 10       | 12        |
| B- ACN% end               | 38        | 40       | 42        |
| C-Column temperature (°C) | 23        | 25       | 27        |
| D-flow rate( ml/min)      | 1.1       | 1.2      | 1.3       |

b) responses measured.

| Std | Run | A  | B  | C  | D   | Responses |         |             |             |
|-----|-----|----|----|----|-----|-----------|---------|-------------|-------------|
|     |     |    |    |    |     | Rt(TMP)   | Rt(FLU) | Rs(SDI-STZ) | Rs(NAL-FLU) |
| 5   | 1   | 8  | 38 | 27 | 1.3 | 4.70      | 18.80   | 2.88        | 4.06        |
| 1   | 2   | 8  | 38 | 23 | 1.1 | 6.70      | 16.80   | 1.96        | 3.66        |
| 2   | 3   | 12 | 38 | 23 | 1.3 | 4.14      | 15.75   | 2.29        | 3.51        |
| 9   | 4   | 10 | 40 | 25 | 1.2 | 4.58      | 17.03   | 2.80        | 3.09        |
| 8   | 5   | 12 | 42 | 27 | 1.3 | 4.20      | 17.80   | 2.80        | 3.70        |
| 7   | 6   | 8  | 42 | 27 | 1.1 | 6.40      | 17.39   | 2.88        | 3.17        |
| 4   | 7   | 12 | 42 | 23 | 1.1 | 4.70      | 18.08   | 2.12        | 4.05        |
| 3   | 8   | 8  | 42 | 23 | 1.3 | 5.10      | 17.05   | 2.15        | 3.81        |
| 6   | 9   | 12 | 38 | 27 | 1.1 | 4.15      | 16.76   | 1.57        | 4.14        |

Table S8: ANOVA results for robustness test. A 5% level of significance was desired.

| <b>Factors</b>       | <b>Rt(TMP)</b> |           | <b>Rt(FLU)</b> |           | <b>Rs(SDI-STZ)</b> |           | <b>Rs(NAL-FLU)</b> |           |
|----------------------|----------------|-----------|----------------|-----------|--------------------|-----------|--------------------|-----------|
|                      | <b>F</b>       | <b>p*</b> | <b>F</b>       | <b>p*</b> | <b>F</b>           | <b>p*</b> | <b>F</b>           | <b>p*</b> |
| <b>A-ACN% start</b>  | 13.85816       | 0.0204    | 0.336647       | 0.5929    | 0.715766           | 0.4452    | 0.109375           | 0.6519    |
| <b>B-ACN% end</b>    | 0.214264       | 0.6675    | 0.603937       | 0.4805    | 0.941322           | 0.3869    | 0.236931           | 0.6793    |
| <b>C-Temperature</b> | 0.601904       | 0.4812    | 1.165424       | 0.3411    | 1.5616             | 0.2796    | 0.198055           | 0.9791    |
| <b>D-Flow rate</b>   | 6.169975       | 0.0679    | 0.016928       | 0.9028    | 1.523044           | 0.2847    | 0.000774           | 0.9687    |

\* p-value should be less than 0.05 to be statistically significant

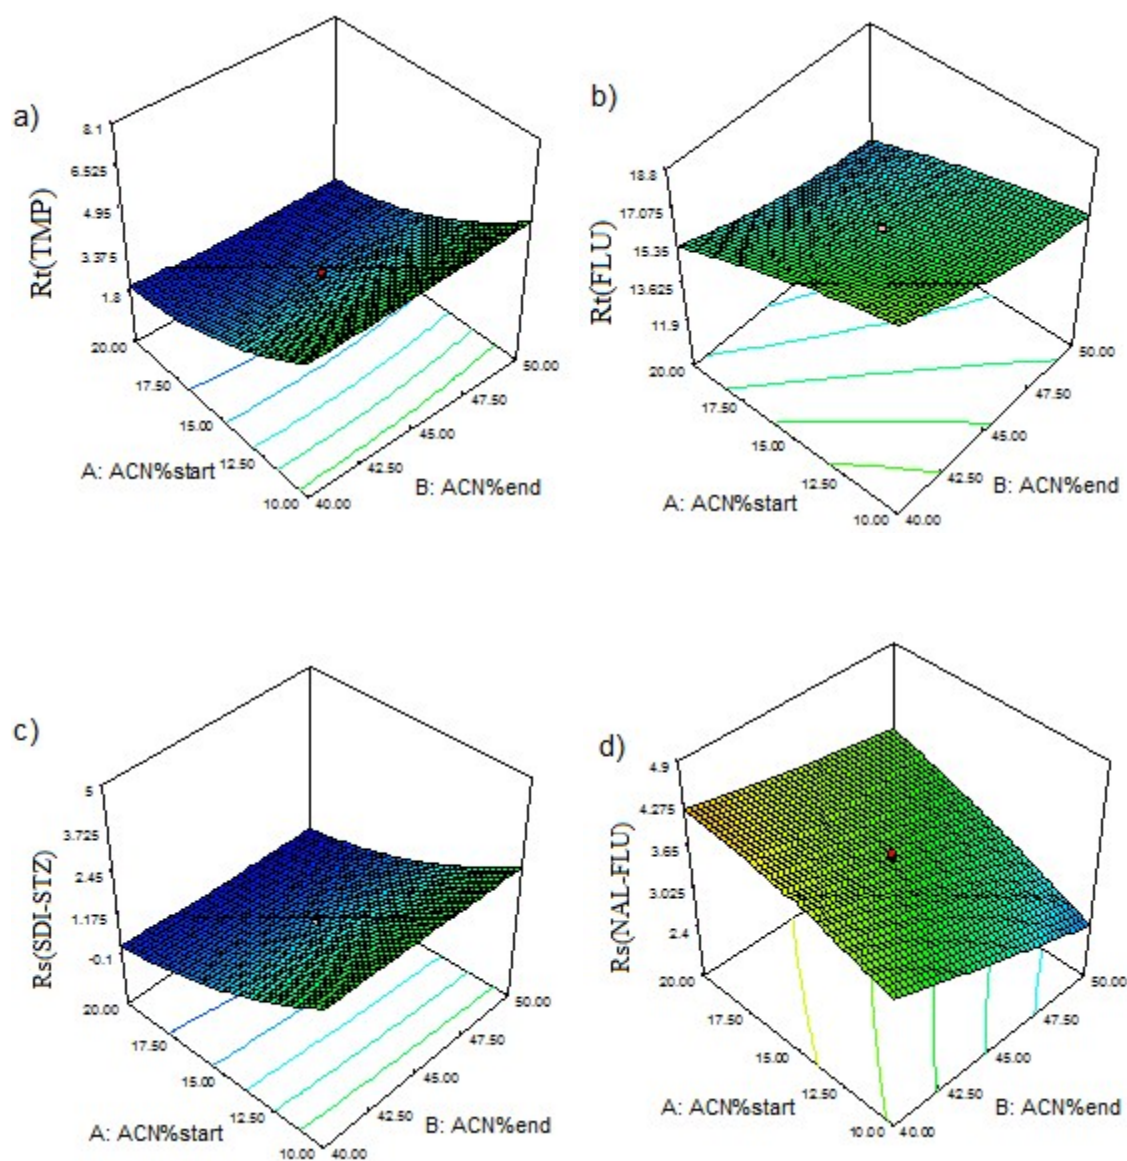

Fig. S1: Responses surfaces related to the interaction effects of the initial fraction of mobile phase B(ACN% start) and the final fraction of mobile phase B (ACN% end): a) the retention time of the first eluted peak  $R_t$ ( TMP) ,b) the retention time of the last eluted peak  $R_t$ ( FLU), c) the resolution of critical pair  $R_s$ (SDI-STZ) and d) the resolution of critical pair  $R_s$ (NAL-FLU) .Column temperature was kept constant at 25°C and flow rate was 1 ml/min.

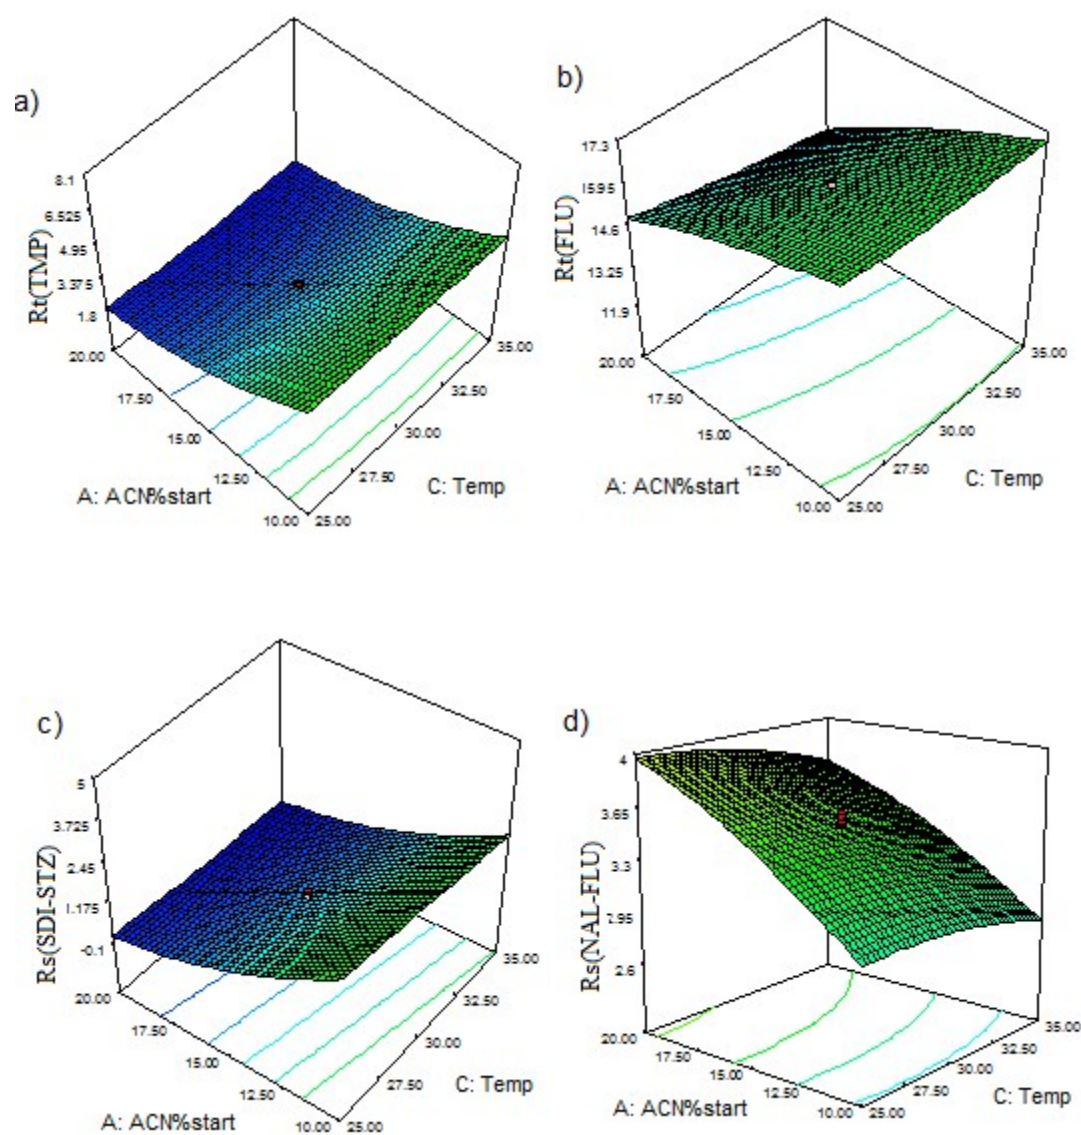

Fig. S2: Responses surfaces related to the interaction effects of the initial fraction of mobile phase B(ACN% start) and Column temperature: a) the retention time of the first eluted peak  $R_t(\text{TMP})$  ,b) the retention time of the last eluted peak  $R_t(\text{FLU})$ , c) the resolution of critical pair  $R_s(\text{SDI-STZ})$  and d) the resolution of critical pair  $R_s(\text{FLU-NAL})$  . the final fraction of mobile phase B (ACN% end) was kept constant at 45% and flow rate of the mobile phase was 1 ml/min.

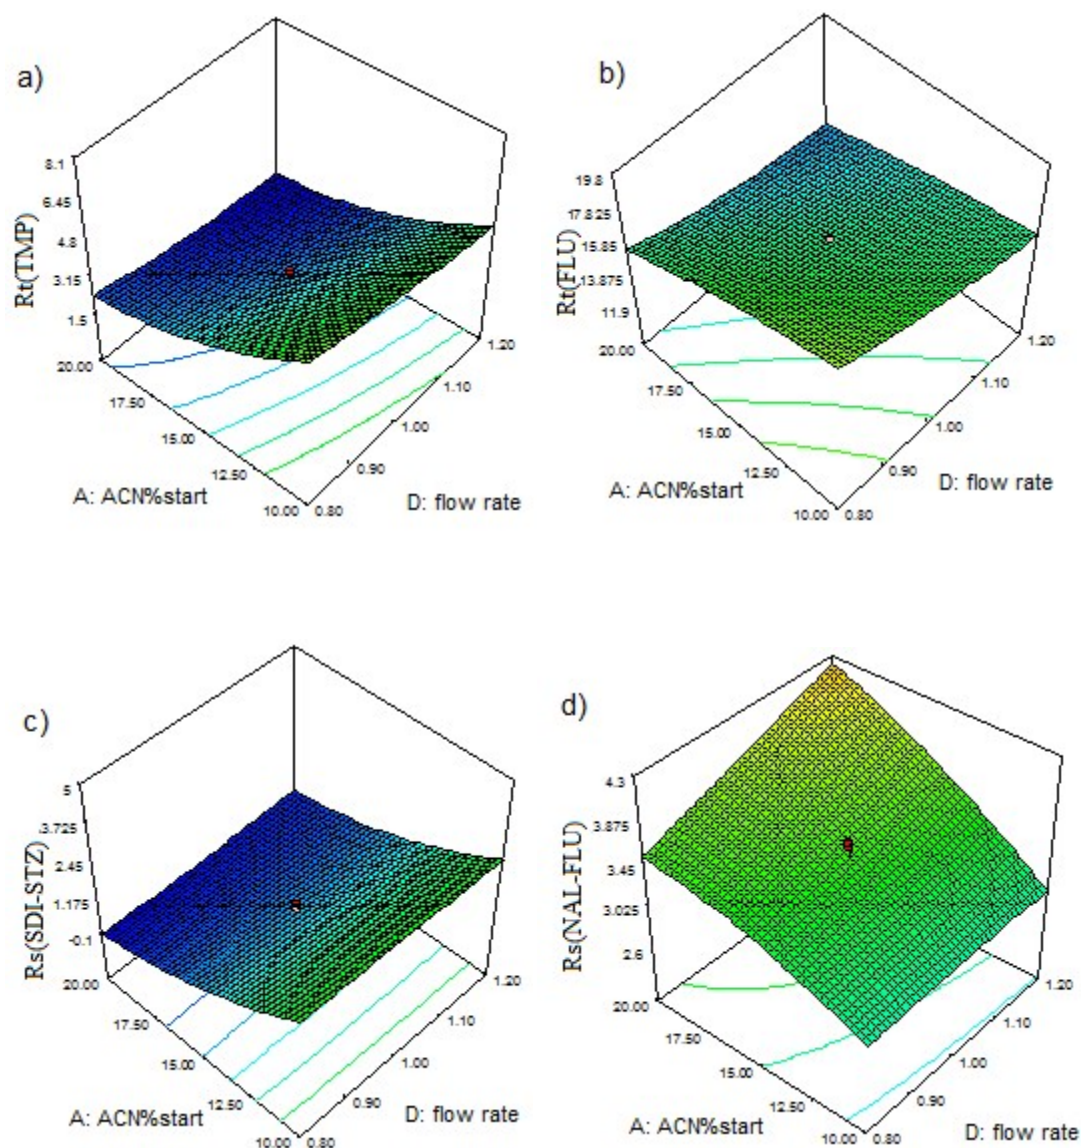

Fig. S3: Responses surfaces related to the interaction effects of the initial fraction of mobile phase B(ACN% start) and flow rate of the mobile phase: a) the retention time of the first eluted peak  $R_t(\text{TMP})$ , b) the retention time of the last eluted peak  $R_t(\text{FLU})$ , c) the resolution of critical pair  $R_s(\text{SDI-STZ})$  and d) the resolution of critical pair  $R_s(\text{FLU-NAL})$ . Column temperature was kept constant at 30°C and the final fraction of mobile phase B (ACN% end) was at 45%.

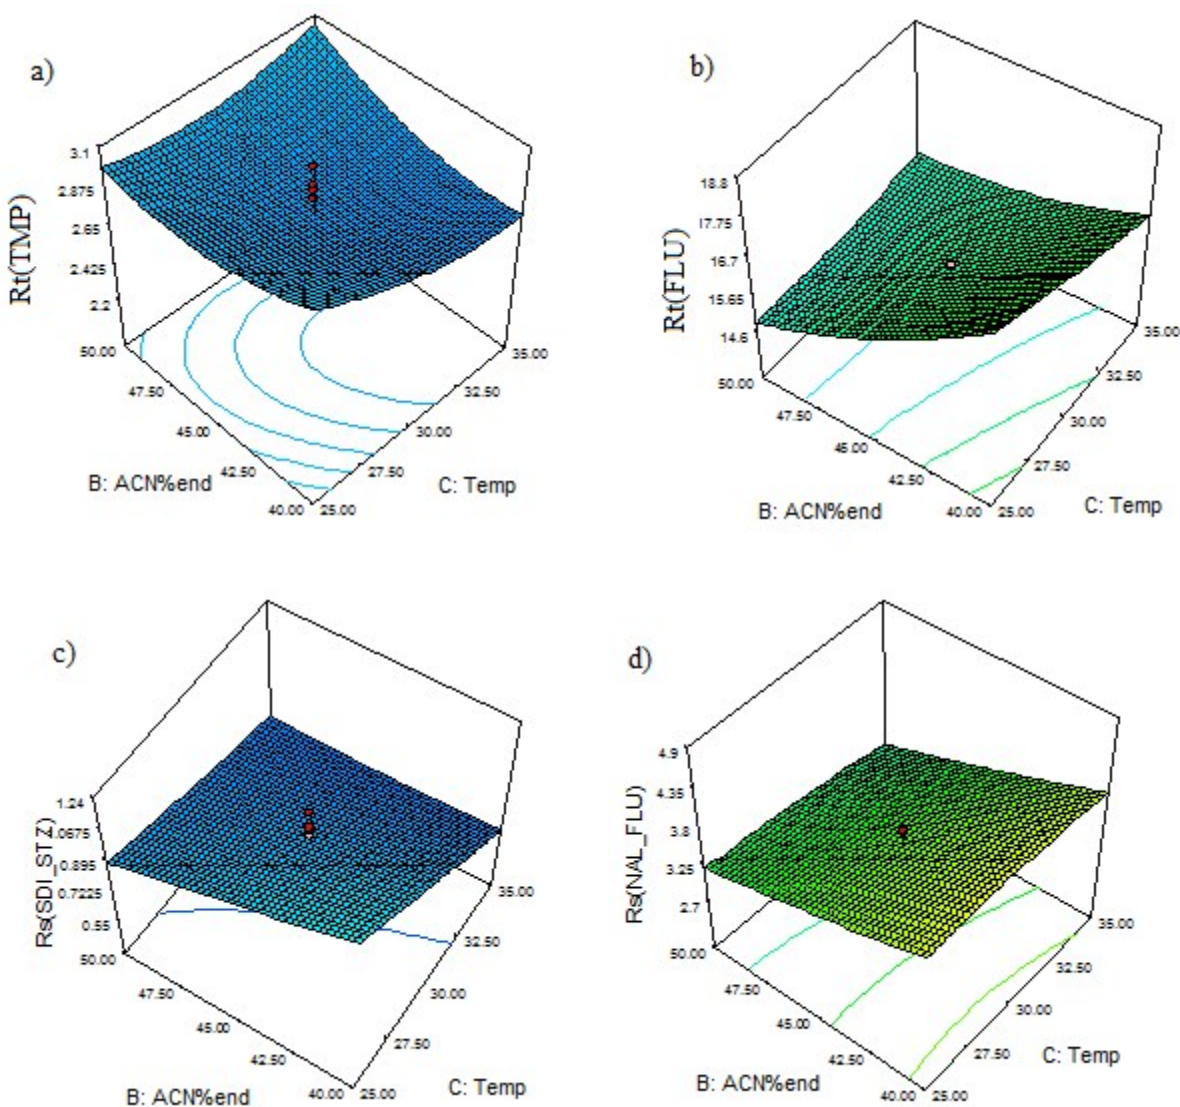

Fig. S4: Responses surfaces related to the interaction effects of the final fraction of mobile phase B (ACN% end) and Column temperature: a) the retention time of the first eluted peak Rt(TMP) ,b) the retention time of the last eluted peak Rt(FLU), c) the resolution of critical pair Rs(SDI-STZ) and d) the resolution of critical pair Rs(NAL-FLU) . the initial fraction of mobile phase B(ACN% start) was kept constant at 15% and flow rate of the mobile phase was 1 ml/min.

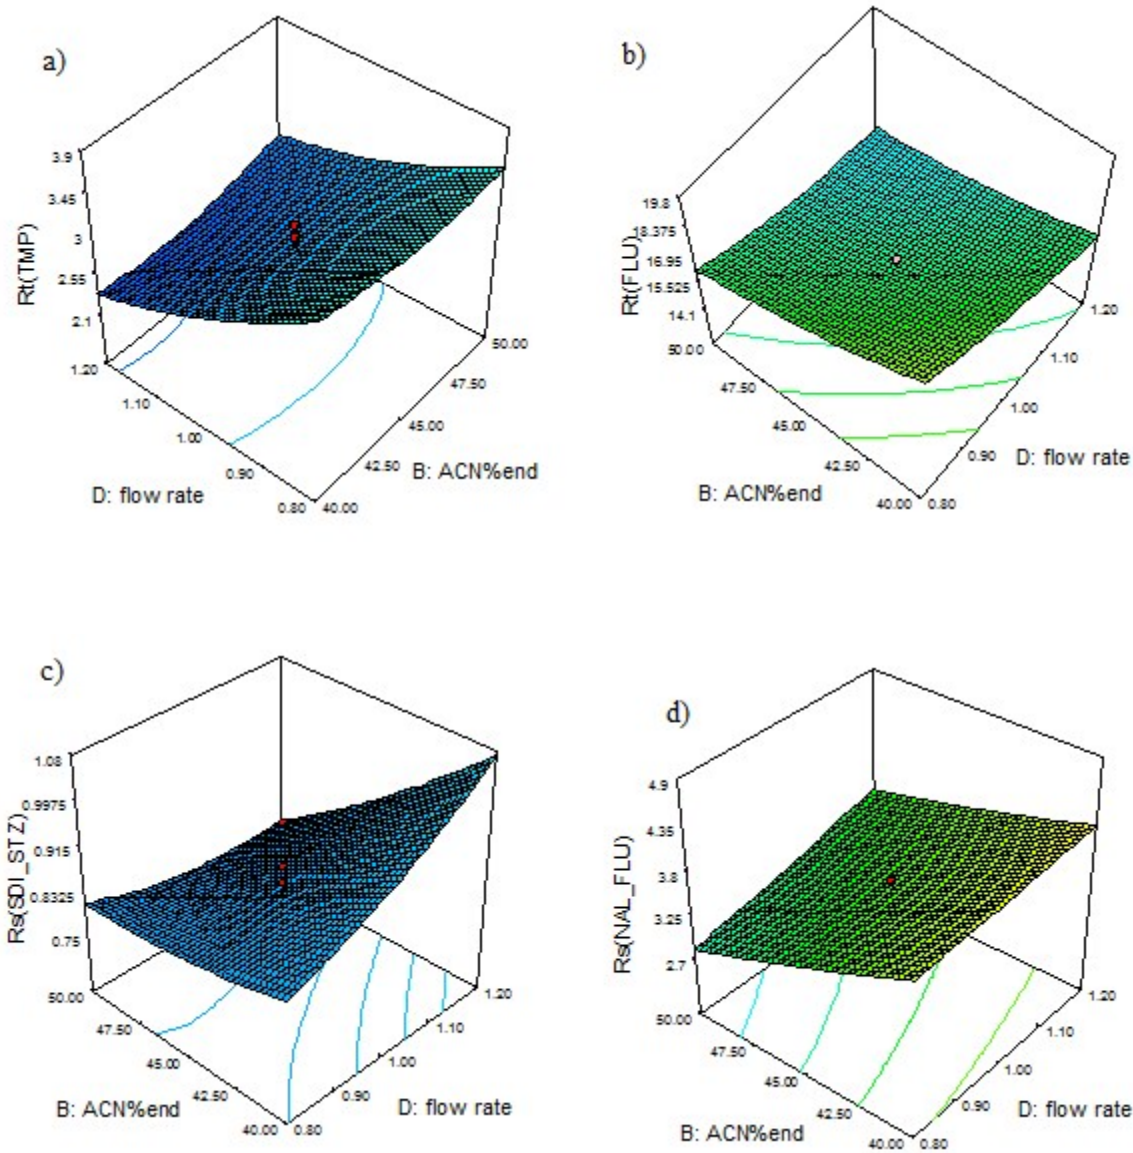

Fig. S5: Responses surfaces related to the interaction effects of the final fraction of mobile phase B (ACN% end) and flow rate of the mobile phase: a) the retention time of the first eluted peak  $R_t(\text{TMP})$ , b) the retention time of the last eluted peak  $R_t(\text{FLU})$ , c) the resolution of critical pair  $R_s(\text{SDI-STZ})$  and d) the resolution of critical pair  $R_s(\text{FLU-NAL})$ . Column temperature was kept constant at 30°C and the initial fraction of mobile phase B (ACN% start) was 15%.

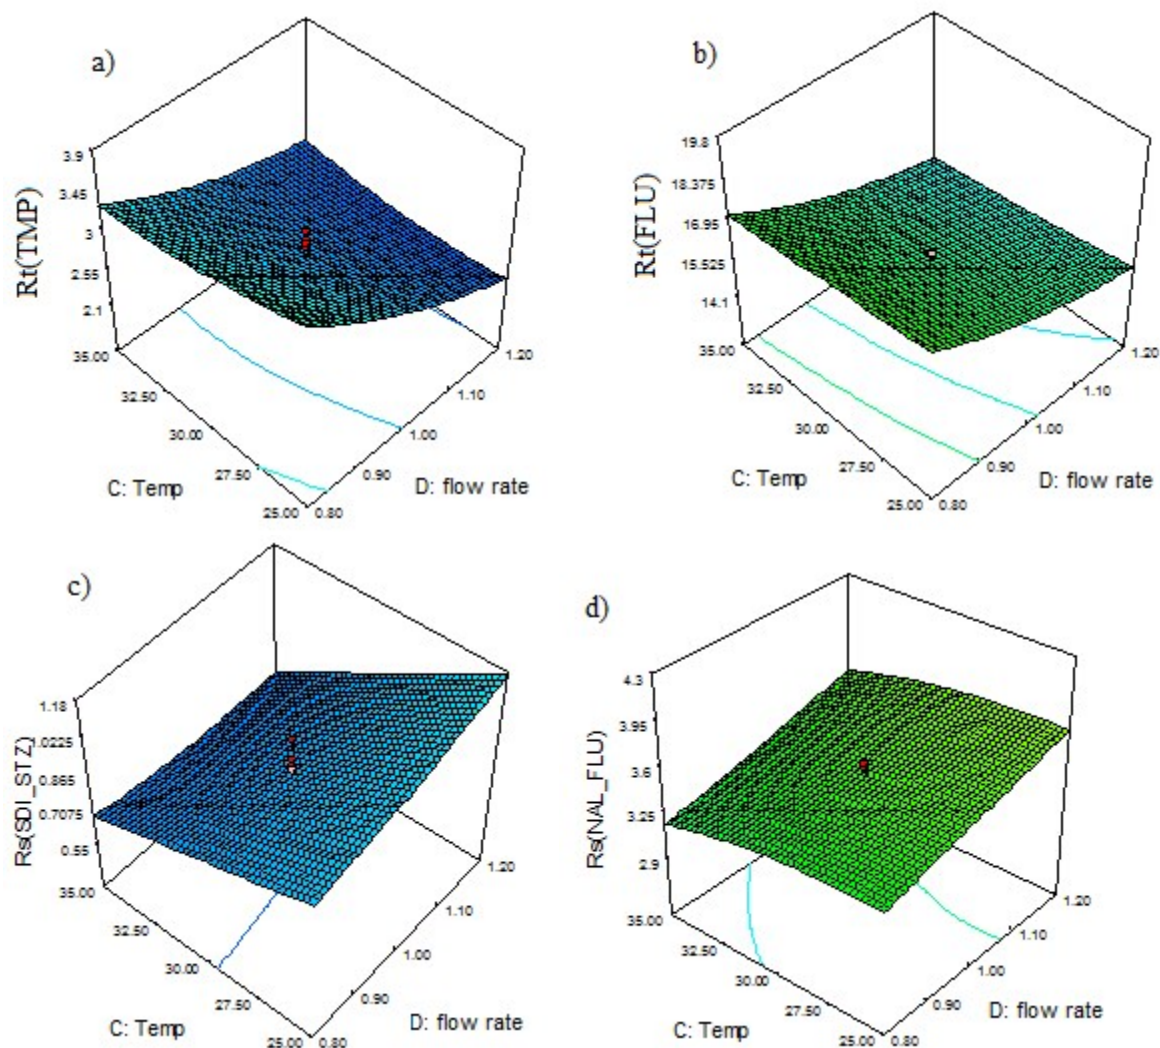

Fig. S6: Responses surfaces related to the interaction effects of Column temperature and flow rate of the mobile phase : a) the retention time of the first eluted peak Rt(TMP) ,b) the retention time of the last eluted peak Rt(FLU), c) the resolution of critical pair Rs (SDI-STZ) and d) the resolution of critical pair Rs (FLU-NAL) . The final fraction of mobile phase B (ACN% end) was kept constant at 45%. and the initial fraction of mobile phase B(ACN% start) was 15%.

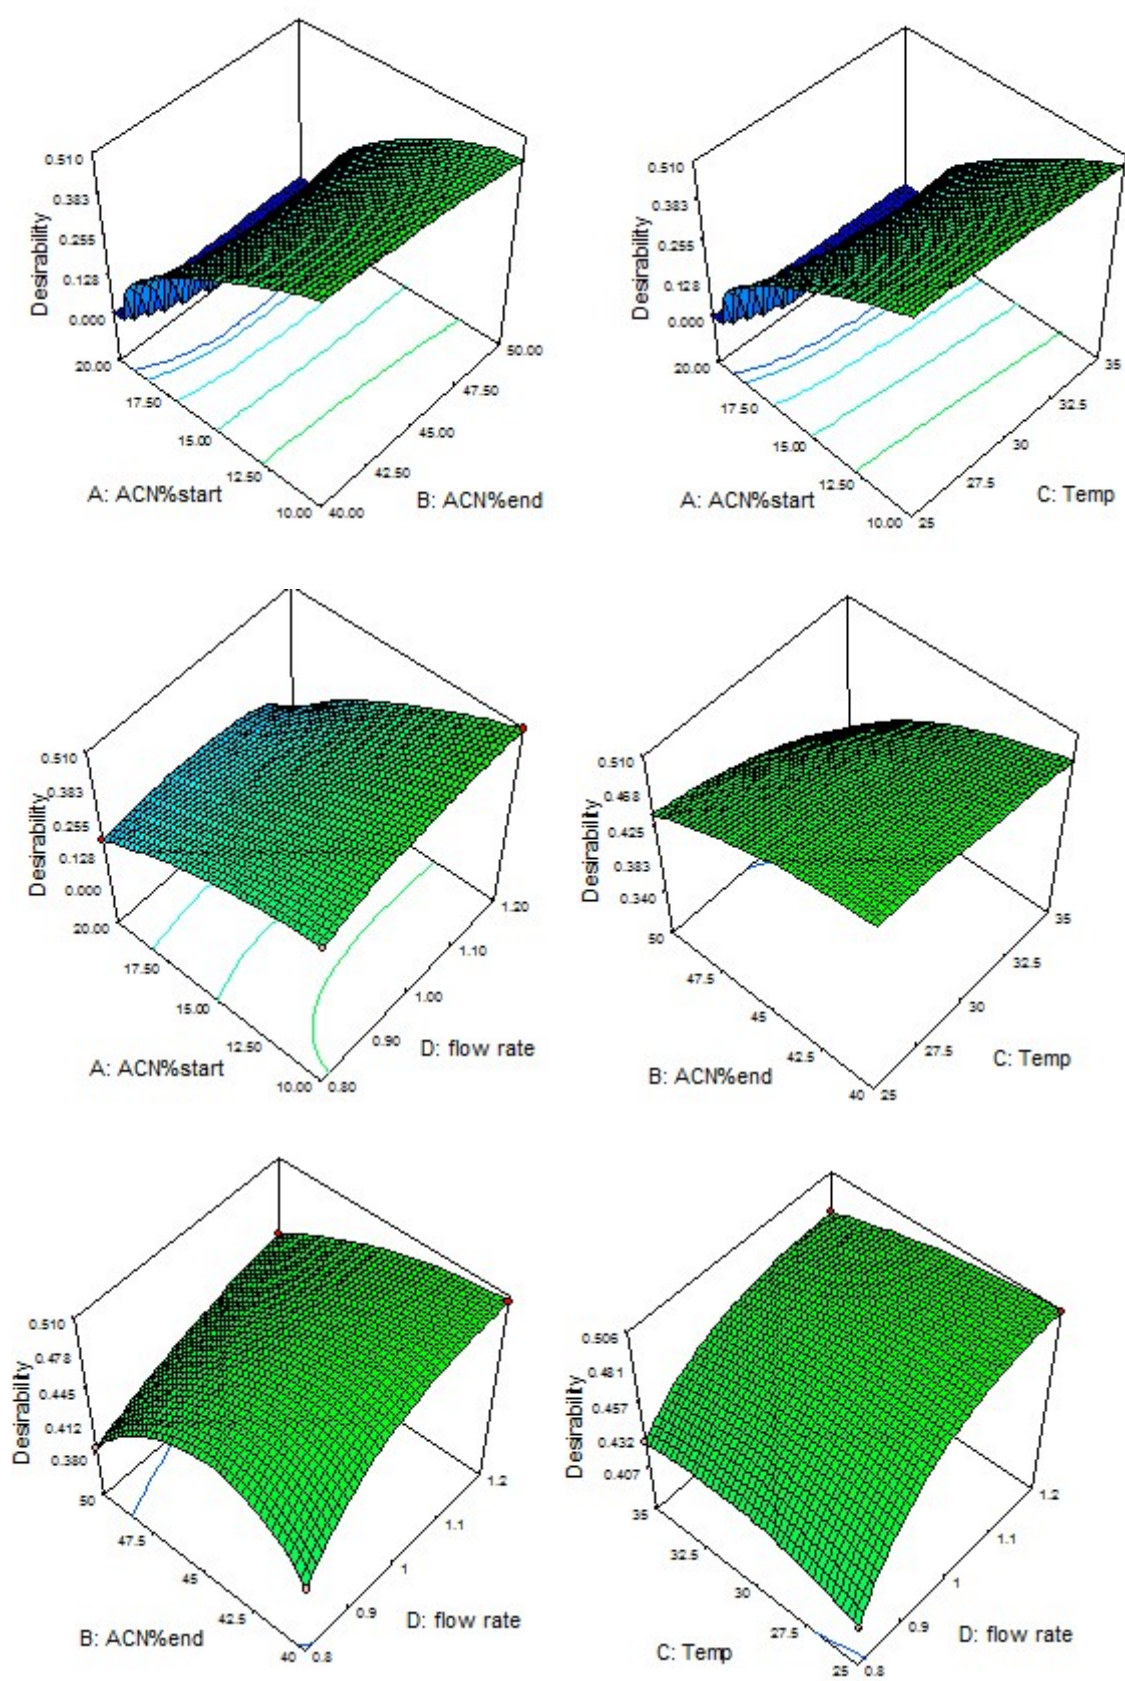

Fig. S7: Response surface obtained for desirability function for different two factors interaction.
